# Supplementary material
Source: publisher site journal article supplement (https://www.degruyterbrill.com/publication/isbn/9783110403886/downloadAsset/9783110403886_AVR__Zusatzmaterial.7z)
Supplement: Supplementary file 2 [file AVR Low Power Checklist.pdf › mark_splm_9783110403848_AVR__Zusatzmaterial/AVR Low Power Checklist.pdf]

## Checkliste zur Energie-Einsparung

| <i>Maßnahme</i>                                      | <i>Register</i>                | <i>Fuses</i> | <i>OK</i> |
|------------------------------------------------------|--------------------------------|--------------|-----------|
| Externe Beschaltung optimieren                       |                                |              |           |
| Niedrige Betriebsspannung                            |                                | BODLEVEL     |           |
| Pico Power / A-Type / XMEGA verwenden                |                                |              |           |
| Vcc oder GND an Eingängen / Pullups                  | PORTx                          |              |           |
| Nichtbenutzte Pins als Eingänge mit Pullups          | DDRx                           |              |           |
| Sleep-Modi nutzen                                    | SMCR                           |              |           |
| Intervallbetrieb mit RTC und RC-Oszillator           |                                | CKSEL        |           |
| Aktive Phasen kurz und schnell                       | CLKPR                          | CKDIV8       |           |
| Dynamischer Taktwechsel                              | CLKPR                          |              |           |
| Low Power Oszillator Modus                           |                                | CKSEL        |           |
| Kurze Oszillator-Anschwingzeit                       |                                | CKSCL/SUT    |           |
| Sleeping BOD / BOD aus / externe BOD                 | MCUCR                          | BODLEVEL     |           |
| On Chip Debugger (OCD) ausschalten                   |                                | OCDEN        |           |
| Debug Wire / JTAG Interface aus                      | MCUCR                          | DWEN/JTAGEN  |           |
| Power Reduction Register nutzen                      | PRR                            |              |           |
| General Purpose I/O-Register nutzen                  | GPIO                           |              |           |
| Virtual Ports nutzen (XMEGA)                         | VPORTx                         |              |           |
| EEPROM/Flash: Power Reduction Mode (XMEGA)           | CTRLB (EPRM/FPRM)              |              |           |
| ADC/AC: Digital-Eingangszweig trennen                | DIDR                           |              |           |
| ADC: Noise Reduction Mode                            | SMCR                           |              |           |
| ADC: 8 Bit ausreichend? (schneller)                  | ADCSR (A) , ADMUX              |              |           |
| Analog Komparator aus                                | ACSR                           |              |           |
| Bandgap Diode aus (Vref)                             | ACSR, ADCSR (A)                | BODLEVEL     |           |
| Watchdog-Timer (WDT) aus                             | MCUSR, WDTCSR                  | WDTON        |           |
| XMEGA: Event System und DMA                          | lt. Datenblatt                 |              |           |
| LCD: Wave Form / Niedrige Frame Rate                 | LCDCCR, LCDFRR, LCDCRA, LCDCRB |              |           |
| Möglichst Hardware statt Software                    |                                |              |           |
| Software auf Geschwindigkeit optimieren (Assembler?) |                                |              |           |

Die Namen einiger Special Function Register und deren Bits können bei den unterschiedlichen AVR Familien von den hier angegebenen abweichen.
